# Supplementary material for: Molecular Detection and Phylogenetic Analyses of <em>Babesia</em> spp. and <em>Theileria</em> spp. In Livestock in Bangladesh
Source: Preprints.org preprint supplement (doi:10.20944/preprints202304.1104.v1), 2023-04-28
Supplement: Supplementary file 1 [file supplementary]

| Status of infection | Jhenaidah  (n = 29) | Bogura  (n = 14) | Sirajganj  (n = 107) | Bandarban  (n = 105) | Naikhonchari  (n = 21) | Total (%)  (n=276) |
| --- | --- | --- | --- | --- | --- | --- |
| **Single infection** | | | | | | |
| *B. bigemina* | 3 (10.34%) | 4 (28.57%) | 29 (27.10%) | 3 (2.86%) | n.d. | 39 (14.13) |
| *B. ovis* | 3 (10.34%) | n.d. | 11 (10.28%) | n.d. |  | 14 (5.07) |
| *T. annulata* | n.d. | n.d. | n.d. | 1 (0.95%) | 6 (28.57%) | 7 (2.54) |
| *T. orientalis* | 4 (13.79%) | 3 (21.43%) | 3 (2.80%) | 23 (21.90) | 1 (4.76%) | 34 (12.32) |
| Sub total | 10 (34.48%) | 7 (50.00%) | 43 (40.19%) | 27 (25.71%) | 7 (33.33%) | 94 (34.04) |
| **Double infections** | | | | | | |
| *B. bigemina* + *B. naoakii* | n.d. | n.d. | 1 (0.93%) | n.d. | n.d. | 1 (0.36) |
| *B. bigemina* + *B. ovis* | 3 (10.34%) | n.d. | 8 (7.48%) | 1 (0.95%) | n.d. | 12 (4.35) |
| *B. naoakii* + *B. ovis* | n.d. | n.d. | 1 (0.93%) | n.d. | n.d. | 1 (0.36) |
| *B. bigemina* + *T. annulata* | n.d. | n.d. | n.d. | 1 (0.95%) | n.d. | 1 (0.36) |
| *B. bigemina* + *T. orientalis* | 3 (10.34%) | 4 (28.57%) | 26 (24.30%) | 46 (43.81%) | n.d. | 79 (28.62%) |
| *B. bovis* + *T. orientalis* | n.d. | n.d. | n.d. | 1 (0.95%) | n.d. | 1 (0.36) |
| *B. ovis* + *T. orientalis* | n.d. | n.d. | 2 (1.87%) | n.d. | n.d. | 2 (0.72) |
| *T. annulata* + *T. orientalis* | n.d. | n.d. | n.d. | 1 (0.95%) | 6 (28.57%) | 7 (2.54) |
| Sub total | 6 (20.68%) | 4 (28.57%) | 38 (35.51%) | 50 (47.62%) | 6 (28.57%) | 104 (37.68) |
| **Triple infections** | | | | | | |
| *B. bigemina* + *B. bovis* + *B. ovis* | n.d. | n.d. | 1 (0.93%) | n.d. | n.d. | 1 (0.36) |
| *B. bigemina* + *B. naoakii* + *T. orientalis* | n.d. | n.d. | 1 (0.93%) | n.d. | n.d. | 1 (0.36) |
| *B. bigemina* + *T. annulata* + *T. orientalis* | n.d. | n.d. | n.d. | 1 (0.95%) | 2 (9.52%) | 3 (1.09) |
| Sub total | n.d. | n.d. | 2 (1.87%) | 1 (0.95%) | 2 (9.52%) | 5 (1.81) |
| Grand total | 16 (55.17%) | 11 (78.57%) | 83 (77.57%) | 78 (74.29%) | 15 (71.43%) | 203 (73.55) |

Table S1. Co‒infections with piroplasms in the blood samples of livestock in Bangladesh

n.d.: not detected
